# Supplementary material for: Understanding ionic mesophase stabilization by hydration: a solid-state NMR study
Source: Royal Society of Chemistry journal article supplement (doi:10.1039/d0cp01511c), 2020-01-01
Supplement: d0cp01511c1.pdf [file d0cp01511c1.pdf]

## Electronic Supplementary Information

### Understanding ionic mesophase stabilization by hydration: A solid-state NMR study

Debashis Majhi, Jing Dai, Andrei V. Komolkin, and Sergey V. Dvinskikh\*

#### Table of Contents

S1. Materials and Methods

S2.  $^{13}\text{C}$ - $^1\text{H}$  PDLF experiment in static sample

S3.  $^{13}\text{C}$ - $^1\text{H}$  APM-CP experiment in spinning sample

S4.  $^{13}\text{C}$ - $^{13}\text{C}$  dipolar CP-INADEQUATE experiment at natural isotopic abundance

S5.  $^{13}\text{C}$ - $^{15}\text{N}$  dipolar spectroscopy at natural isotopic abundance

S6. Natural abundance deuterium (NAD) NMR

S7. Bond order parameters  $S_{\text{CH}}$  in the imidazolium ring of the  $\text{C}_{12}\text{mim}$  cation with different anions

S8.  $^1\text{H}$  isotropic chemical shifts

S9. Water translational diffusion in  $\text{C}_{12}\text{mimBr}\cdot\text{H}_2\text{O}$

## S1. Materials and Methods

Ionic mesogenic materials  $C_{12}mimCl$  and  $C_{12}mimBr$  (1-dodecyl-3-methylimidazolium chloride and bromide, respectively) were purchased from ABCR GmbH, Karlsruhe. Monohydrated samples were prepared by equilibrating for about 12 h in a desiccator with  $RH \approx 85\%$ , stabilized by a saturated KCl solution. Representative NMR spectra of samples in mesophase are shown in Fig. S1a,b.

**Table S1.** Water contents and phase transition temperatures

| Ionic liquid             | H <sub>2</sub> O mole fraction <sup>a)</sup> | $T_{Cr \rightarrow Sm}$ , °C | $T_{Iso \rightarrow Sm}$ , °C |
|--------------------------|----------------------------------------------|------------------------------|-------------------------------|
| $C_{12}mimCl$            | 0.004                                        | 36                           | 118                           |
| $C_{12}mimCl \cdot H_2O$ | 0.48                                         | 30                           | 154                           |
| $C_{12}mimBr$            | 0.025                                        | 40                           | 102                           |
| $C_{12}mimBr \cdot H_2O$ | 0.50                                         | 36                           | 129                           |

<sup>a)</sup> Water content was estimated from  $^1H$  NMR spectra in isotropic phase

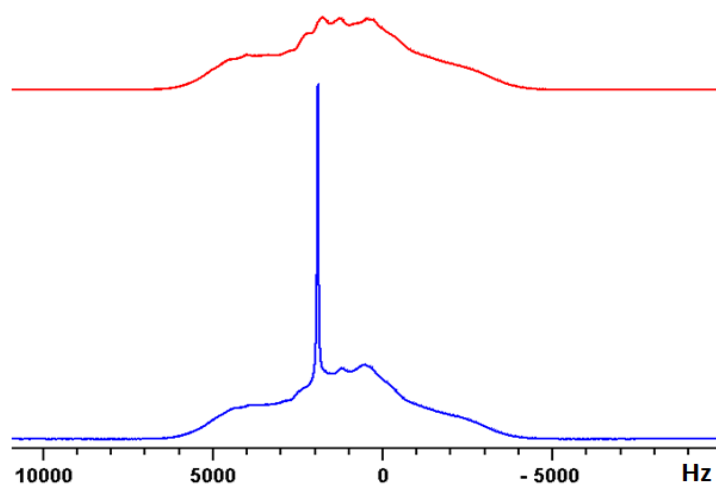

**Figure S1a.** Proton NMR spectra in smectic A phase of anhydrous (top, 95°C) and monohydrated (bottom, 120°C)  $C_{12}mimCl$  salt.

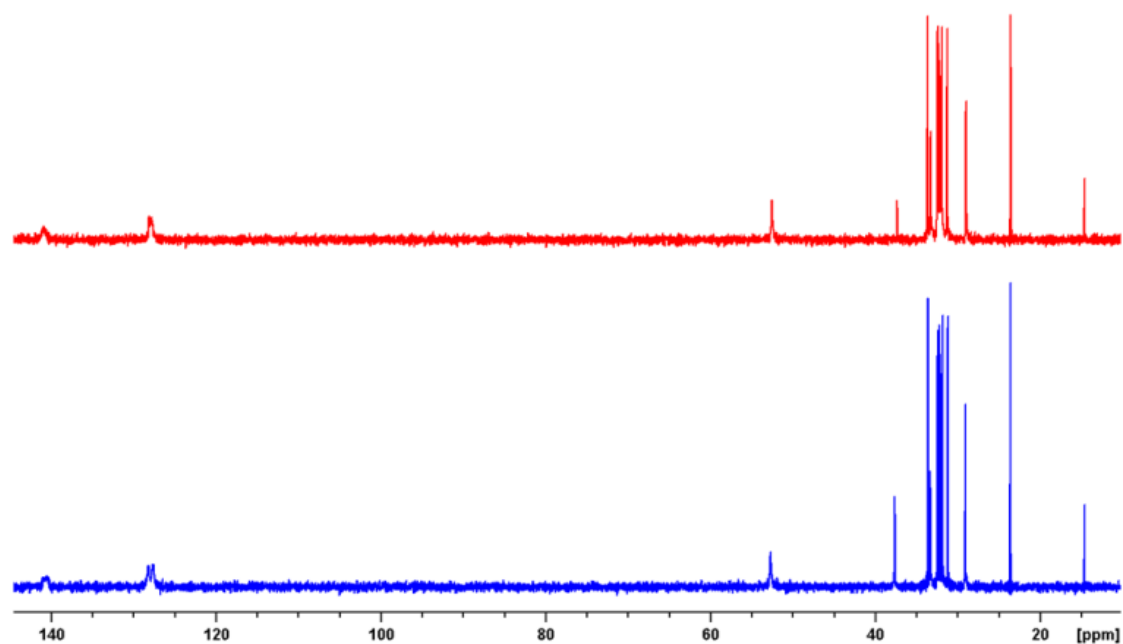

**Figure S1b.** Carbon-13 cross-polarization (CP) proton-decoupled NMR spectra in the smectic A phase of anhydrous (top, 95°C) and monohydrated (bottom, 120°C) C<sub>12</sub>mimCl salt. In uniaxial mesophases, the rigid-lattice CSA tensor is averaged into an axially symmetric tensor with principal components  $\delta_{\parallel}$  and  $\delta_{\perp}$ , corresponding to LC domains with the director oriented parallel and perpendicular to the magnetic field, respectively, and with isotropic chemical shift  $\delta^{\text{iso}} = (\delta_{\parallel}^{LC} + 2\delta_{\perp}^{LC})/3$ . In our samples, which exhibit a negative anisotropy of the diamagnetic susceptibility, the director aligns in the plane perpendicular to the magnetic field of the spectrometer. Hence, the observed chemical shifts are determined by the  $\delta_{\perp}^{LC}$  values.<sup>1</sup>

## S2. $^{13}\text{C}$ - $^1\text{H}$ PDLF experiment in static sample

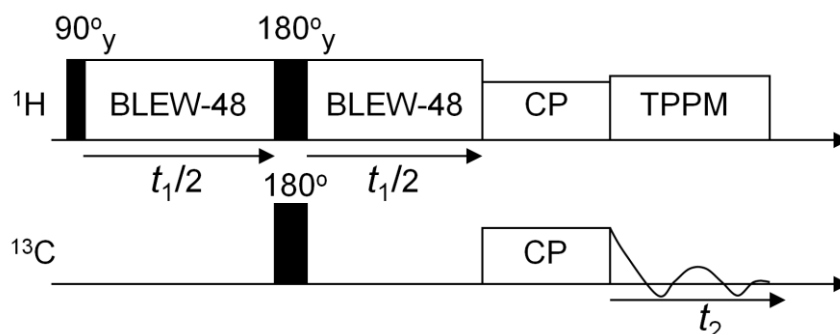

**Figure S2a.** PDLF pulse sequence to record dipolar  $^{13}\text{C}$ - $^1\text{H}$  spectra in static samples. In the indirect time period  $t_1$  of the PDLF experiment,<sup>2</sup> proton ( $^1\text{H}$ ) magnetization evolves in the presence of the local dipolar fields of rare  $^{13}\text{C}$  spins. Application of the proton homonuclear decoupling sequence BLEW-48 scales the heteronuclear couplings  $d_{\text{CH}}$  with a factor of  $k \approx 0.42$ .<sup>3</sup> A pair of  $180^\circ$  pulses is applied at  $t_1/2$  to refocus  $^1\text{H}$  chemical shifts while retaining the  $^1\text{H}$ - $^{13}\text{C}$  couplings. The proton magnetization is transferred to  $^{13}\text{C}$  spins via CP and the carbon signal is detected under TPPM  $^1\text{H}$  heteronuclear decoupling.<sup>4</sup>

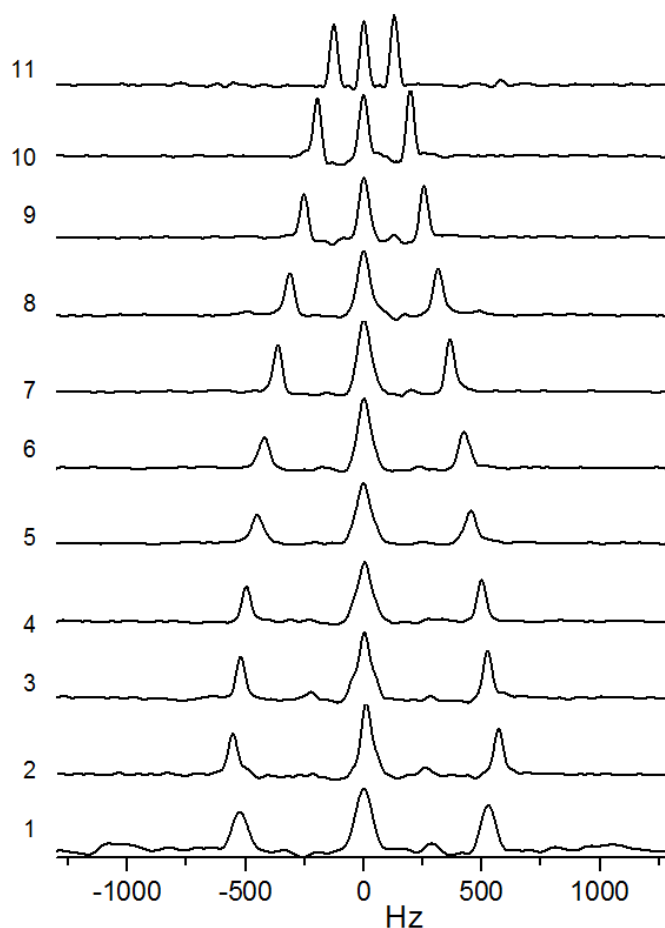

**Figure S2b.** Cross-sections along dipolar dimension from 2D PDLF spectrum in  $\text{C}_{12}\text{mimBr}\cdot\text{H}_2\text{O}$  smectic A phase at  $107^\circ\text{C}$  are shown for the alkyl chain carbons.

### S3. $^{13}\text{C}$ - $^1\text{H}$ APM-CP experiment in spinning sample

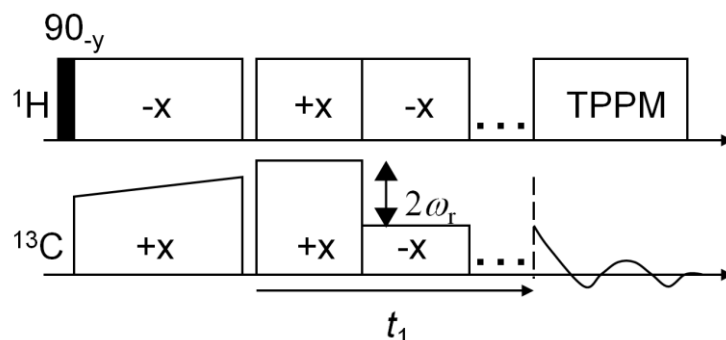

**Figure S3a.** APM-CP pulse sequence to record dipolar  $^{13}\text{C}$ - $^1\text{H}$  spectra in spinning samples.<sup>5,6</sup> After the CP signal enhancement, the dipolar evolution period is initiated by inverting the phase of the  $^1\text{H}$  spin-lock field. The rf fields during  $t_1$  period are phase- and amplitude-modulated to achieve the  $^1\text{H}$ - $^{13}\text{C}$  heteronuclear dipolar recoupling. Finally, the  $^{13}\text{C}$  signal is detected in the presence of the heteronuclear  $^1\text{H}$  decoupling.

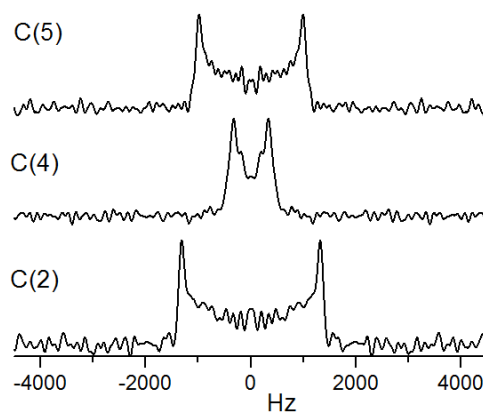

**Figure S3b.** Cross-sections along dipolar dimension from 2D APM-CP spectrum in  $\text{C}_{12}\text{mimCl}$  smectic A phase at  $73^\circ\text{C}$  are shown for the imidazolium carbons. Spectra were measured at 5 kHz sample spinning speed and with average recoupling radio-frequency field of  $\gamma B_1/2\pi = 28$  kHz.

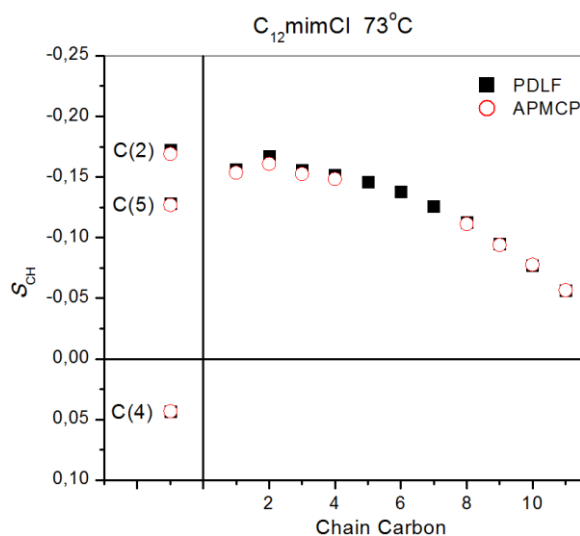

**Figure S3c.** Comparison of the C-H bond order parameters  $S_{\text{CH}}$  obtained from PDLF and APM-CP experiments in  $\text{C}_{12}\text{mimCl}$  smectic A phase at  $73^\circ\text{C}$ . Carbon sites 5–7 of the alkyl chain were not resolved in APM-CP spectrum.

**S4.  $^{13}\text{C}$ - $^{13}\text{C}$  dipolar CP-INADEQUATE experiment at natural isotopic abundance.**

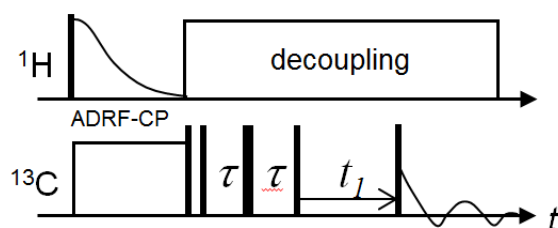

**Figure S4a.** INADEQUATE pulse sequence<sup>7</sup> was modified by (i) using ADRF CP for  $^{13}\text{C}$  signal enhancement<sup>8</sup> and (ii) setting the excitation delay  $\tau$  to generate double quantum (DQ) coherences according to range of dipolar couplings to be measured.<sup>9</sup>

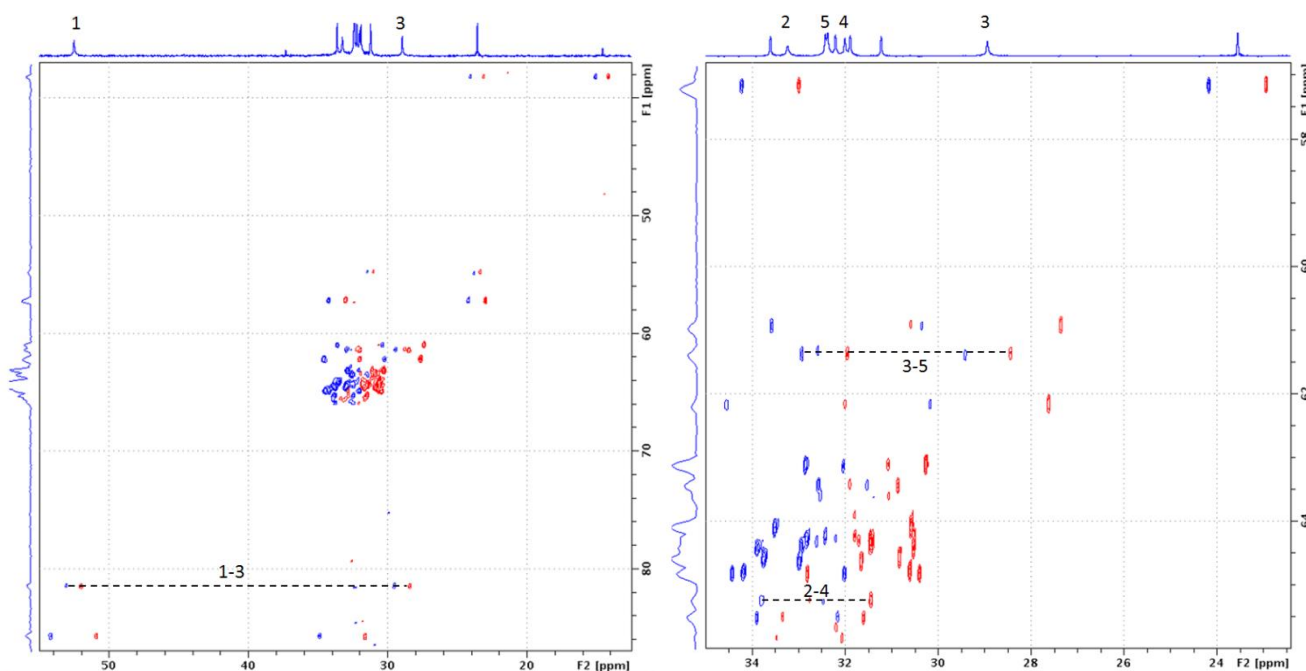

**Figure S4b.**  $^{13}\text{C}$ - $^{13}\text{C}$  INADEQUATE spectra in the smectic A phase of  $\text{C}_{12}\text{mimCl}$  at  $95\text{ }^\circ\text{C}$ . The excitation delay in DQ-filter is set to  $\tau = 0.83\text{ ms}$ . Correlation peaks between chain carbons 1-3, 2-4, and 3-5 separated by two bonds are indicated by dashed lines. The observed splittings  $\Delta\nu$ , contributed by the C-C dipolar coupling depend on the frequency difference  $\Delta\delta$  between involved spins. When  $\Delta\delta$  is small compared to the splitting  $\Delta\nu$ , the dipolar coupling is given by  $d_{\text{CC}} = \Delta\nu/3$ , while for the opposite case  $d_{\text{CC}} = (\Delta\nu - J)/2$ . For intermediate cases, numerical analysis was performed to determine  $d_{\text{CC}}$ . For carbons separated by two bonds, literature values of the  $J$ -coupling are small, within 0-2 Hz range, and were neglected in the analysis.<sup>10</sup>

## S5. $^{13}\text{C}$ - $^{15}\text{N}$ dipolar spectroscopy at natural isotopic abundance.

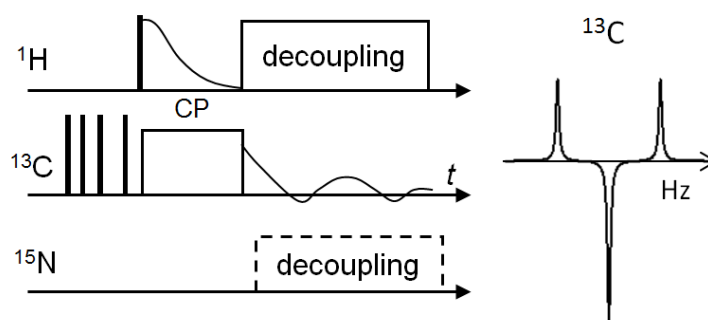

**Figure S5a.**  $^{13}\text{C}$  CP spectra acquired without and with  $^{15}\text{N}$  decoupling in alternate scans are subtracted from each other.<sup>11,12</sup> In the resulting difference spectrum, the central peak of uncoupled spins is suppressed while the signal of  $^{13}\text{C}$ - $^{15}\text{N}$  coupled pairs is preserved. A dipolar interaction with abundant  $^1\text{H}$  spins is removed by proton decoupling applied to both spectra. In the scans acquired without nitrogen decoupling, the  $^{13}\text{C}$ - $^{15}\text{N}$  coupled pairs lead to dipolar doublets in the  $^{13}\text{C}$  spectrum, whereas they contribute to a residual central peak in the scans with  $^{15}\text{N}$  decoupling. The difference spectrum thus represents a superposition of the  $^{13}\text{C}$ - $^{15}\text{N}$  doublet and the central peak of the opposite sign.

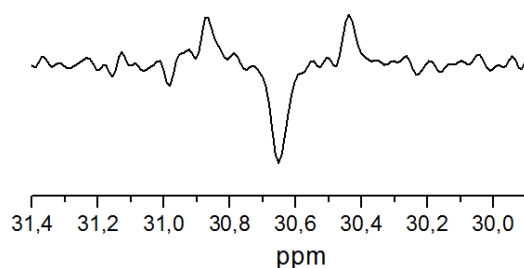

**Figure S5b.**  $^{13}\text{C}$ - $^{15}\text{N}$  dipolar spectrum acquired by recording  $^{13}\text{C}$  difference spectra with nitrogen-15 decoupling in alternating scans. 8k scans were accumulated with a relaxation delay of 4 s (12 h measurement time).

## S6. Natural abundance deuterium (NAD) NMR

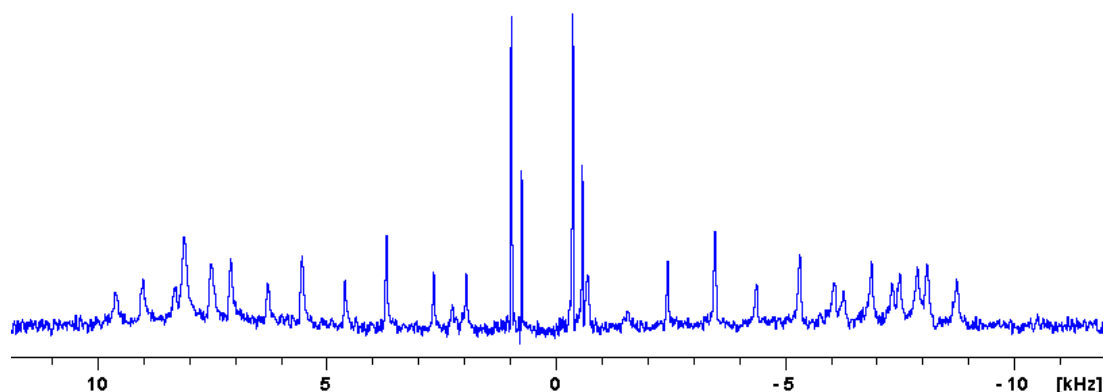

**Figure S6.**  $^2\text{H}$  NMR spectrum of  $\text{C}_{12}\text{mimCl}$  in smectic A phase at  $110\text{ }^\circ\text{C}$ . Spectrum is measured at the natural isotopic abundance of  $^2\text{H}$  (0.015%) and in the presence of  $^1\text{H}$  decoupling. 128k scans were accumulated with relaxation delay 0.5s (18 h experimental time).

**S7. Bond order parameters  $S_{CH}$  in the imidazolium ring of the  $C_{12}mim$  cation with different anions.**

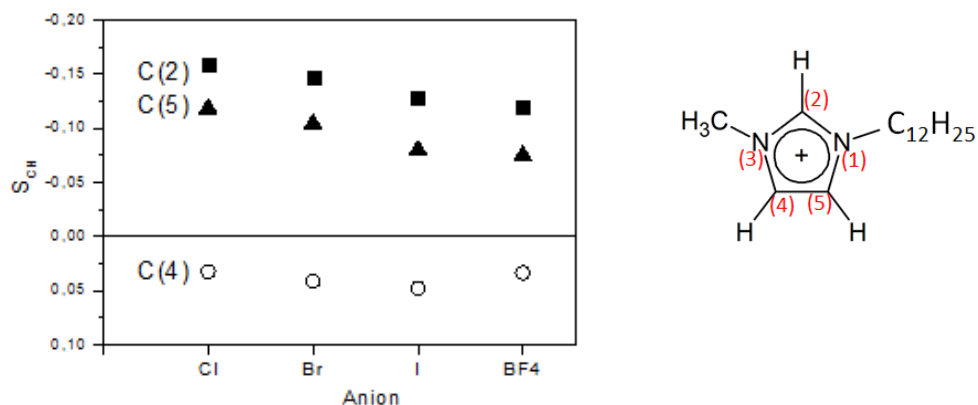

**Figure S7.** Bond order parameters  $S_{CH}$  in the imidazolium ring for the anhydrous  $C_{12}mimX$  salts with different anions  $X = BF_4, I, Cl,$  and  $Br$ . Data are compared at approximately the same difference temperature  $\Delta T$  with respect to clearing temperature  $\Delta T = T - T_C \approx 20^\circ C$ .

**S8.  $^1H$  isotropic chemical shifts**

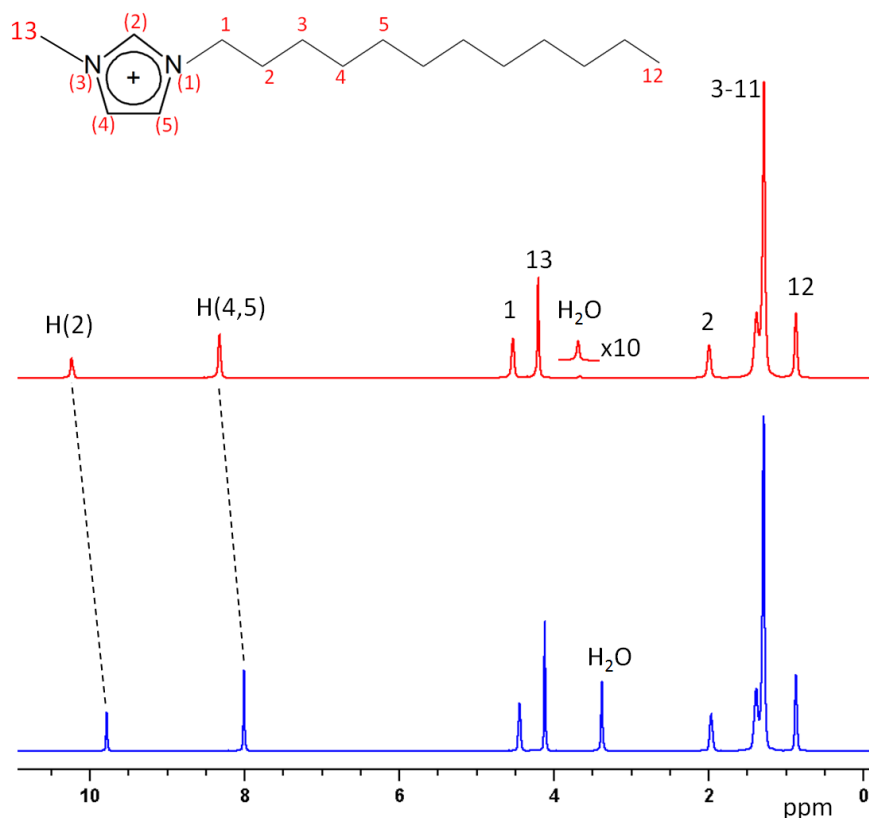

**Figure S8.**  $^1H$  chemical shift spectra of anhydrous (top) and monohydrated  $C_{12}mimBr$  (bottom) samples in the isotropic phase.



## S9. Water translational diffusion in C<sub>12</sub>mimBr·H<sub>2</sub>O

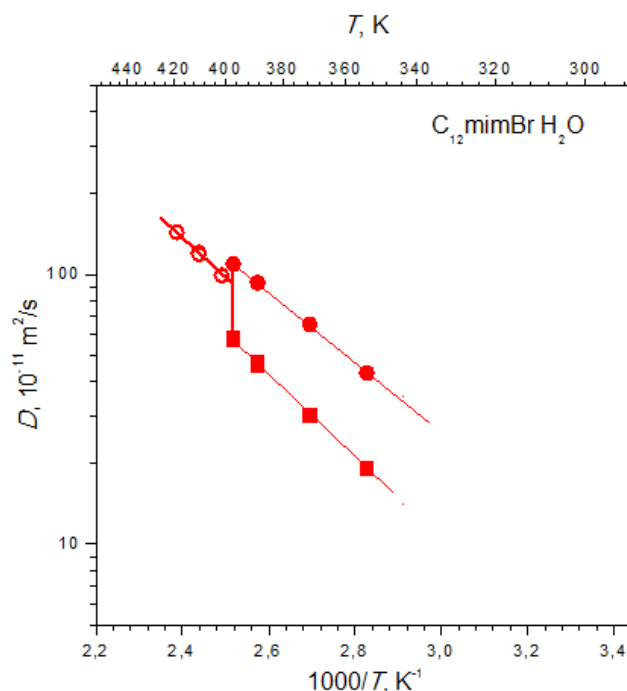

**Figure S9.** Water diffusion coefficients,  $D_{\text{iso}}$  (o),  $D_{\parallel}$  (■), and  $D_{\perp}$  (●) in the isotropic and smectic A phases of C<sub>12</sub>mimBr·H<sub>2</sub>O ionic liquid. Lines are guides for the eye.

## References

- 1 S. V. Dvinskikh, in *Modern Methods in Solid-State NMR: A practitioners' Guide*, ed. P. Hodgkinson, Royal Society of Chemistry, Abingdon, 2018.
- 2 B. M. Fung, K. Ermolaev and Y. Yu, *J. Magn. Reson.*, 1999, **138**, 28-35.
- 3 D. P. Burum, M. Linder and R. R. Ernst, *J. Magn. Reson.*, 1981, **44**, 173-188.
- 4 A. E. Bennett, C. M. Rienstra, M. Auger, K. V. Lakshmi and R. G. Griffin, *J. Chem. Phys.*, 1995, **103**, 6951-6958.
- 5 S. V. Dvinskikh, V. Castro and D. Sandström, *Phys. Chem. Chem. Phys.*, 2005, **7**, 3255-3257.
- 6 S. V. Dvinskikh and V. I. Chizhik, *J. Exp. Theor. Phys.*, 2006, **102**, 91-101.
- 7 S. Berger and S. Braun, *200 and More NMR Experiments: A Practical Course*, Wiley, Leipzig, 2004.
- 8 J. S. Lee and A. K. Khitritin, *J. Chem. Phys.*, 2008, **128**, 114504.
- 9 D. Sandström and M. H. Levitt, *J. Am. Chem. Soc.*, 1996, **118**, 6966-6974.
- 10 L. B. Krivdin and E. W. Della, *Progr. Nucl. Magn. Reson. Spectrosc.*, 1991, **23**, 301-610.
- 11 L. Jackalin, B. B. Kharkov, A. V. Komolkin and S. V. Dvinskikh, *Phys. Chem. Chem. Phys.*, 2018, **20**, 22187-22196.
- 12 M. Cifelli, V. Domenici, V. I. Chizhik and S. V. Dvinskikh, *Appl. Magn. Reson.*, 2018, **4**, 553-562.
